# Supplementary material for: Comparison of robotic and open partial nephrectomy for highly complex renal tumors (RENAL nephrometry score ≥10)
Source: PubMed Central journal article supplement (PMC6328203; doi:10.1371/journal.pone.0210413), 2019-01-10
Supplement: pone.0210413.s003.pdf [file pone.0210413.s003.pdf]

**S1 Table. Comparative analysis of perioperative outcomes between high and low volume surgeons**

| Variables                                              | Mean (SD) or counts (%)        |                             | P      |
|--------------------------------------------------------|--------------------------------|-----------------------------|--------|
|                                                        | High volume surgeons<br>(N=77) | Low volume surgeon<br>(N=8) |        |
| Operation time, min                                    | 149.1 (58.4)                   | 210.7 (78.7)                | 0.011  |
| Estimated blood loss, ml                               | 206.6 (174.1)                  | 571.4 (461.8)               | <0.001 |
| Warm ischemic time, min                                | 26.4 (10.4)                    | 38.8 (14.7)                 | 0.008  |
| Transfusion                                            |                                |                             |        |
| Intraoperative                                         | 1 (1.3%)                       | 2 (25.0%)                   | 0.022  |
| Postoperative                                          | 4 (5.2%)                       | 1 (12.5%)                   | 0.398  |
| Intraoperative complications                           | 6 (7.8%)                       | 2 (25.0%)                   | 0.163  |
| Postoperative complications                            |                                |                             |        |
| Overall (Clavien 1-5), n (%)                           | 14 (18.2%)                     | 2 (25.0%)                   | 0.639  |
| Major (Clavien 3-5), n (%)                             | 8 (10.4%)                      | 0 (0)                       | 0.338  |
| Length of hospital stay, day                           | 5.1 (1.2)                      | 5.1 (0.9)                   | 0.781  |
| VAS score for pain in postoperative 1 day              | 4.4 (0.9)                      | 4.5 (1.1)                   | 0.698  |
| eGFR decline from baseline, ml/min/1.73 m <sup>2</sup> | 6.9 (17.6)                     | 2.4 (22.3)                  | 0.503  |
