# Supplementary material for: Comparison of robotic and open partial nephrectomy for highly complex renal tumors (RENAL nephrometry score ≥10)
Source: PubMed Central journal article supplement (PMC6328203; doi:10.1371/journal.pone.0210413), 2019-01-10
Supplement: pone.0210413.s004.pdf [file pone.0210413.s004.pdf]

**S2 Table. Perioperative outcomes after excluding the data of low volume surgeon**

| Variables                                              | Mean (SD) or counts (%) |                         | P      |
|--------------------------------------------------------|-------------------------|-------------------------|--------|
|                                                        | OPN (N=64)              | RPN, high volume (N=77) |        |
| Operation time, min                                    | 150.5 (61.5)            | 149.2 (58.4)            | 0.895  |
| Estimated blood loss, ml                               | 234.7 (177.2)           | 206.6 (174.1)           | 0.356  |
| Warm ischemic time, min                                | 24.6 (10.7)             | 26.4 (10.4)             | 0.335  |
| Transfusion                                            |                         |                         |        |
| Intraoperative                                         | 3 (4.8%)                | 1 (1.3%)                | 0.221  |
| Postoperative                                          | 4 (6.3%)                | 4 (5.2%)                | 0.770  |
| Intraoperative complications                           | 4 (6.3%)                | 6 (7.8%)                | 0.722  |
| Postoperative complications                            |                         |                         |        |
| Overall (Clavien 1-5), n (%)                           | 15 (23.4%)              | 14 (18.2%)              | 0.442  |
| Major (Clavien 3-5), n (%)                             | 9 (14.1%)               | 8 (10.4%)               | 0.505  |
| Length of hospital stay, day                           | 6.8 (2.1)               | 5.1 (0.8)               | <0.001 |
| VAS score for pain in postoperative 1 day              | 4.2 (1.3)               | 4.4 (0.9)               | 0.493  |
| eGFR decline from baseline, ml/min/1.73 m <sup>2</sup> | 3.8 (16.6)              | 6.8 (17.6)              | 0.284  |
